# Supplementary material
Source: publisher site journal article supplement (https://www.spandidos-publications.com/4275/downloadSupplementary)
Supplement: Supplementary file 1 [file downloadSupplementary]

Figure S1. The standard curve representing the invasion from the growth medium with 10% FBS to the growth medium with 10% FBS, and from the growth medium with 1% FBS to the growth medium with 1% FBS. Mean values  $\pm$  SEM from three independent experiments (n=3) performed in triplicate are presented.

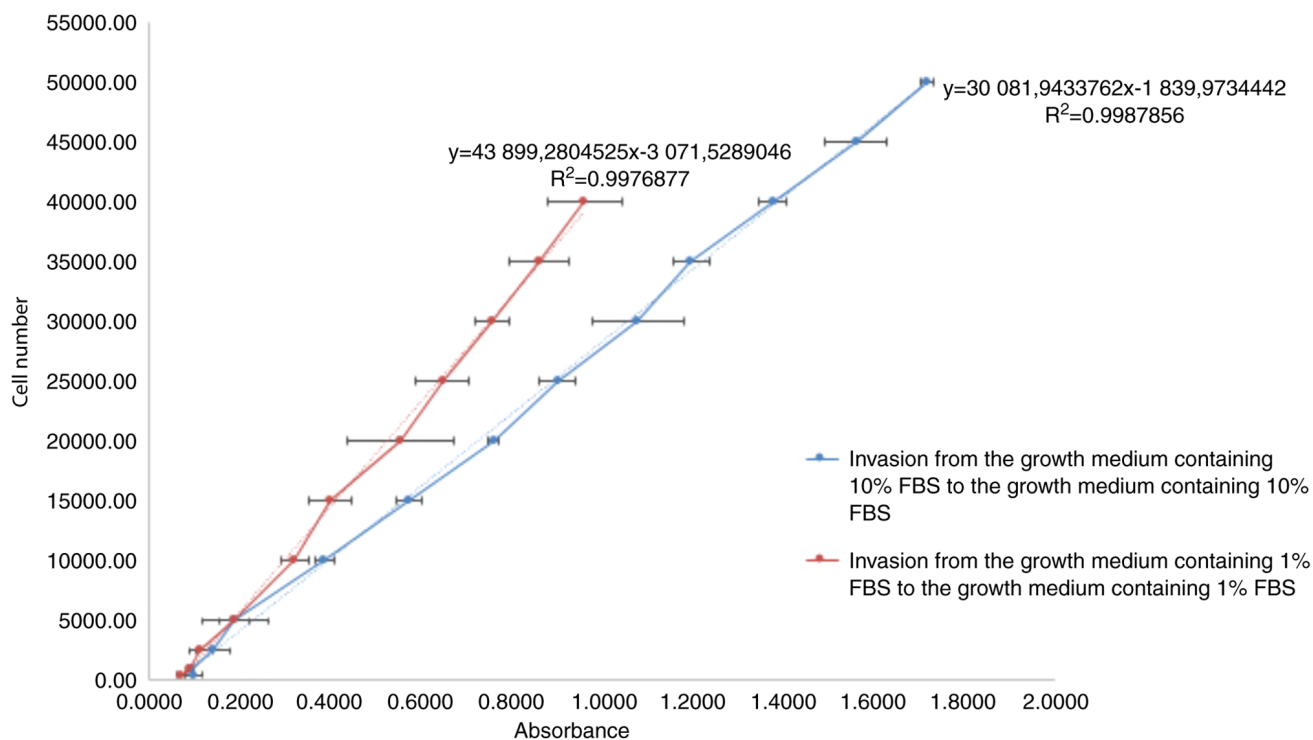

Figure S2. Whole western blots (uncropped blots from Fig. 1) showing the bands with molecular weight markers. DMSO-dimethylsulfoxide.

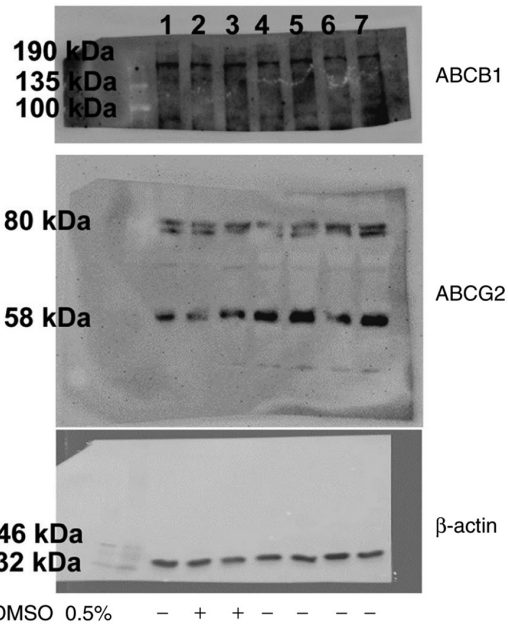

Legend:

- 1-Control in growth medium
- 2-Control in growth medium with 0.5% DMSO
- 3-Elacridar (5  $\mu$ M)
- 4-Perphenazine (0.1  $\mu$ M)
- 5-Perphenazine (1.0  $\mu$ M)
- 6-Prochlorperazine (0.1  $\mu$ M)
- 7-Prochlorperazine (1.0  $\mu$ M)

Figure S3. Whole western blot (uncropped blots from Fig. 4) showing the bands with molecular weight markers.

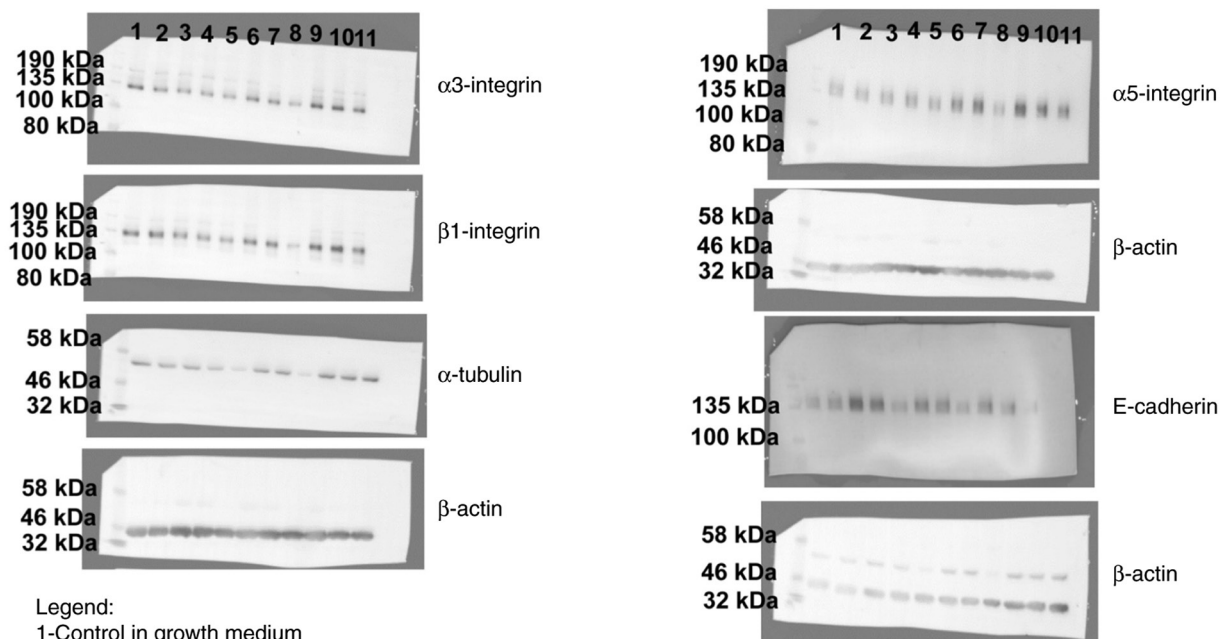

Legend:

- 1-Control in growth medium
- 2-Error (not analyzed)
- 3-Perphenazine (0.25  $\mu$ M)
- 4-Perphenazine (0.5  $\mu$ M)
- 5-Perphenazine (1.0  $\mu$ M)
- 6-Prochlorperazine (0.25  $\mu$ M)
- 7-Prochlorperazine (0.5  $\mu$ M)
- 8-Prochlorperazine (1.0  $\mu$ M)
- 9-Bacitracin (1.25 mM)
- 10-Bacitracin (2.5 mM)
- 11-Bacitracin (5.0 mM)
